# Supplementary material
Source: PubMed Central journal article supplement (PMC6669958)
Supplement: nxy217_supplemental_file.pdf [file nxy217_supplemental_file.pdf]

**Supplemental Table 1. Food groups and items in the MASALA study**

| <b>Food group</b>                 | <b>Food item</b>                                                                                                                                                                                                                                                                                                                                                                           |
|-----------------------------------|--------------------------------------------------------------------------------------------------------------------------------------------------------------------------------------------------------------------------------------------------------------------------------------------------------------------------------------------------------------------------------------------|
| Alcohol                           | Beer, wine, spirits                                                                                                                                                                                                                                                                                                                                                                        |
| Beans and legumes                 | All cooked dried beans and lentils                                                                                                                                                                                                                                                                                                                                                         |
| Whole grains                      | 100% whole wheat bread, whole wheat and cooked cereals, traditional preparations such as <i>roti</i> (flatbread), <i>chapatti</i> (flatbread)                                                                                                                                                                                                                                              |
| Some whole grains                 | 60% whole wheat bread, traditional preparations such as <i>naan</i> (leavened flatbread), <i>paratha</i> (flatbread), <i>puri</i> (fried flatbread), <i>mathri</i> (fried flatbread)                                                                                                                                                                                                       |
| Refined grains                    | White bread, ready-to-eat breakfast cereals, muffins, crackers, rice: plain boiled, fried rice and <i>pulaos</i> (similar to pilaf)                                                                                                                                                                                                                                                        |
| Fats and oil                      | Butter, margarine, <i>ghee</i> (clarified butter) and oil used for tempering or on boiled rice and breads                                                                                                                                                                                                                                                                                  |
| Fruit, including 100% fruit juice | Citrus and non-citrus fruit and 100 % fruit juices                                                                                                                                                                                                                                                                                                                                         |
| Meat, poultry and seafood         | Preparations with beef, pork, goat or lamb, hot dogs and sausages, lunch meat, liver, preparations with chicken, preparations with fish and seafood                                                                                                                                                                                                                                        |
| Egg                               | Preparations with egg                                                                                                                                                                                                                                                                                                                                                                      |
| Dairy                             | Milk, cream and half and half, cheese, cream cheese, yoghurt and cottage cheese or <i>paneer</i>                                                                                                                                                                                                                                                                                           |
| Mixed dishes                      | Soup, pizza and pasta                                                                                                                                                                                                                                                                                                                                                                      |
| Nuts and oilseeds                 | Coconut, nuts and peanut butter                                                                                                                                                                                                                                                                                                                                                            |
| Snacks                            | <i>Samosas</i> (generally fried pastry with filling), fritters or <i>pakorras</i> , <i>chaat</i> (savoury snack), <i>bhajia</i> , <i>sev</i> and <i>gathia</i> (types of snack foods made with chickpea flour), <i>tikias</i> (potato patties and vegetable cutlets), french fried potatoes, popcorn, potato chips and nachos                                                              |
| Sweets and desserts               | Traditional South-Asian sweets and desserts including <i>barfi</i> (sweet confectionery made with condensed milk and sugar), <i>ladoo</i> (mostly flour-based dessert), <i>halwa</i> (dense pudding), <i>kheer</i> (pudding), <i>gulab jamun</i> (milk solids-based dessert), <i>rasgullas</i> (cottage cheese-based dessert), cake, doughnuts and sweet rolls, pies and tarts and cookies |
| Sugar, candy and jam              | Sugar or honey, chocolate, candy and jam                                                                                                                                                                                                                                                                                                                                                   |
| Sugar-sweetened beverages         | Fruit drinks and non-diet soft drinks                                                                                                                                                                                                                                                                                                                                                      |
| Starchy vegetables                | Potato and potato preparations and green peas                                                                                                                                                                                                                                                                                                                                              |
| Vegetables                        | Cauliflower, cabbage, green peppers, broccoli, okra, dark green leafy vegetables, tomato, onion, squash, pumpkin, aubergine, lettuce, cucumber, carrots, sweet potato, leeks                                                                                                                                                                                                               |

**Supplemental Table 2. Socio-demographic and health characteristics by vegetarian status among men in the MASALA cohort<sup>1</sup>**

|                                       | Vegetarian<br>N=142 | Non-Vegetarian<br>N=330 | <i>P</i> |
|---------------------------------------|---------------------|-------------------------|----------|
| Age (y)                               | 56.6±10.4           | 56.0±9.7                | 0.503    |
| Current smoker, %                     | 2.8                 | 5.8                     | 0.174    |
| Education ≥BS <sup>2</sup> , %        | 93.0                | 88.8                    | 0.165    |
| Income ≥ \$75K, %                     | 67.9                | 75.2                    | 0.104    |
| Traditional cultural beliefs, %       |                     |                         | <0.001   |
| -Strong                               | 50.4                | 27.1                    |          |
| -Intermediate                         | 29.1                | 32.5                    |          |
| -Weak                                 | 20.6                | 40.4                    |          |
| Intentional exercise (MET min/week)   | 975 (420-1790)      | 1030 (315-1890)         | 0.878    |
| Alternative health eating index score | 67.2±5.2            | 70.3±7.6                | <0.001   |
| Alcohol, g/d                          | 0 (0-1.1)           | 2.5 (0.3-8.0)           | <0.001   |
| Energy intake, kcal/d                 | 1630 (1320-1970)    | 1750 (1430-2130)        | 0.012    |
| Body Mass Index (kg/m <sup>2</sup> )  | 25.3±4.0            | 26.1±3.9                | 0.031    |
| Waist circumference (cm)              | 94.5±10.1           | 96.6±9.3                | 0.035    |
| Total Cholesterol (mg/dL)             | 177±36.6            | 185±37.1                | 0.037    |
| Triglycerides (mg/dL)                 | 119 (88-167)        | 128 (91-172)            | 0.222    |
| LDL-cholesterol (mg/dL)               | 105±31.5            | 111±32.4                | 0.059    |
| HDL-cholesterol (mg/dL)               | 45.5±11.2           | 45.1±10.6               | 0.722    |
| Statin use, %                         | 26.8                | 32.7                    | 0.198    |
| Fasting plasma glucose (mg/dL)        | 95 (88-107)         | 98 (90-114)             | 0.062    |
| HOMA-IR <sup>2</sup>                  | 2.5 (1.7-3.5)       | 2.9 (1.9-4.7)           | 0.003    |
| Diabetes medication use, %            | 21.1                | 18.5                    | 0.505    |
| Systolic blood pressure (mm Hg)       | 125±14.9            | 127±14.6                | 0.119    |
| Diastolic blood pressure (mm Hg)      | 74.9±8.0            | 77.2±9.0                | 0.009    |
| Antihypertensive medication use, %    | 32.4                | 35.8                    | 0.482    |
| Fatty liver (HU <sup>2</sup> <40), %  | 6.4                 | 13.3                    | 0.030    |
| Common CIMT <sup>2</sup> (mm)         | 0.88 (0.77-0.99)    | 0.88 (0.78-1.02)        | 0.489    |
| Internal CIMT <sup>2</sup> (mm)       | 1.11 (0.90-1.31)    | 1.18 (1.04-1.47)        | 0.002    |

<sup>1</sup> Values are percentage, mean ± SD, or median (IQR).

<sup>2</sup> BS: bachelor's degree, HOMA-IR: homeostatic model assessment-insulin resistance, HU: Hounsfield unit, CIMT: carotid intima-media thickness

**Supplemental Table 3. Socio-demographic and health characteristics by vegetarian status among women in the MASALA cohort<sup>1</sup>**

|                                       | Vegetarian<br>N=193 | Non-Vegetarian<br>N=227 | <i>P</i> |
|---------------------------------------|---------------------|-------------------------|----------|
| Age (y)                               | 54.8±8.2            | 54.0±9.0                | 0.388    |
| Current smoker, %                     | 0.5                 | 1.8                     | 0.241    |
| Education ≥BS <sup>2</sup> , %        | 84.5                | 85.9                    | 0.677    |
| Income ≥ \$75K, %                     | 73.0                | 75.1                    | 0.624    |
| Traditional cultural beliefs, %       |                     |                         | <0.001   |
| -Strong                               | 40.9                | 25.6                    |          |
| -Intermediate                         | 29.0                | 27.3                    |          |
| -Weak                                 | 30.1                | 47.1                    |          |
| Intentional exercise (MET min/week)   | 870 (368-1740)      | 788 (300-1880)          | 0.634    |
| Alternative health eating index score | 69.0±4.8            | 72.6±7.0                | <0.001   |
| Alcohol, g/d                          | 0 (0-0.1)           | 0 (0-1.4)               | <0.001   |
| Energy intake, kcal/d                 | 1500 (1240-1800)    | 1550 (1250-1880)        | 0.155    |
| Body Mass Index (kg/m <sup>2</sup> )  | 25.8±4.1            | 26.3±4.3                | 0.213    |
| Waist circumference (cm)              | 88.6±9.3            | 89.6±10.6               | 0.343    |
| Total Cholesterol (mg/dL)             | 192±33.5            | 195±37.5                | 0.312    |
| Triglycerides (mg/dL)                 | 117 (90-148)        | 106 (80-139)            | 0.013    |
| LDL-cholesterol (mg/dL)               | 111±29.0            | 116±33.4                | 0.094    |
| HDL-cholesterol (mg/dL)               | 55.5±13.3           | 55.8±14.2               | 0.814    |
| Statin use, %                         | 21.8                | 21.6                    | 0.965    |
| Fasting plasma glucose (mg/dL)        | 92 (86-100)         | 91 (86-100)             | 0.743    |
| HOMA-IR <sup>2</sup>                  | 2.1 (1.5-3.0)       | 2.3 (1.5-3.6)           | 0.285    |
| Diabetes medication use, %            | 14.0                | 11.0                    | 0.356    |
| Systolic blood pressure (mm Hg)       | 123±16.3            | 122±17.0                | 0.664    |
| Diastolic blood pressure (mm Hg)      | 69.8±9.5            | 69.9±9.7                | 0.895    |
| Antihypertensive medication use, %    | 24.9                | 26.0                    | 0.793    |
| Fatty liver (HU <sup>2</sup> <40), %  | 4.2                 | 8.9                     | 0.055    |
| Common CIMT <sup>2</sup> (mm)         | 0.80 (0.67-0.90)    | 0.83 (0.71-0.95)        | 0.286    |
| Internal CIMT <sup>2</sup> (mm)       | 1.08 (0.95-1.21)    | 1.05 (0.91-1.23)        | 0.561    |

<sup>1</sup> Values are percentage, mean ± SD, or median (IQR).

<sup>2</sup> BS: bachelor's degree, HOMA-IR: homeostatic model assessment-insulin resistance, HU: Hounsfield unit, CIMT: carotid intima-media thickness

**Supplemental Table 4. Socio-demographic and health characteristics by sex in the MASALA cohort<sup>1</sup>**

|                                        | Men<br>N=472     | Women<br>N=420   | <i>P</i> |
|----------------------------------------|------------------|------------------|----------|
| Age (y)                                | 56.2±9.9         | 54.4±8.6         | 0.004    |
| Current smoker, %                      | 4.9              | 1.2              | 0.002    |
| Education ≥BS <sup>2</sup> , %         | 90.0             | 85.2             | 0.029    |
| Income ≥ \$75K, %                      | 73.0             | 74.1             | 0.716    |
| Traditional cultural beliefs, %        |                  |                  | 0.303    |
| -Strong                                | 34.0             | 32.6             |          |
| -Intermediate                          | 31.5             | 28.1             |          |
| -Weak                                  | 34.5             | 39.3             |          |
| Intentional exercise (MET min/week)    | 1020 (344-1890)  | 840 (315-1840)   | 0.225    |
| Alternative health eating index score  | 69.4±7.1         | 70.9±6.3         | <0.001   |
| Alcohol, g/d                           | 1.2 (0-5.8)      | 0 (0-0.6)        | <0.001   |
| Energy intake, kcal/d                  | 1720 (1390-2060) | 1530 (1240-1850) | <0.001   |
| Body Mass Index (kg/m <sup>2</sup> )   | 25.9±4.0         | 26.1±4.2         | 0.395    |
| Waist circumference (cm)               | 96.0±9.6         | 89.1±10.0        | <0.001   |
| Total Cholesterol (mg/dL)              | 183±37.1         | 194±35.8         | <0.001   |
| Triglycerides (mg/dL)                  | 126 (91-172)     | 112 (84-143)     | <0.001   |
| LDL-cholesterol (mg/dL)                | 109±32.2         | 114±31.5         | 0.022    |
| HDL-cholesterol (mg/dL)                | 45.2±10.8        | 55.6±13.8        | <0.001   |
| Statin use, %                          | 21.8             | 21.6             |          |
| Fasting plasma glucose (mg/dL)         | 97 (89-112)      | 92 (86-100)      | <0.001   |
| HOMA-IR <sup>2</sup>                   | 2.8 (1.8-4.4)    | 2.2 (1.5-3.4)    | <0.001   |
| Diabetes medication use, %             | 19.3             | 12.4             | 0.005    |
| Systolic blood pressure (mm Hg)        | 126±14.7         | 123±16.7         | <0.001   |
| Diastolic blood pressure (mm Hg)       | 76.5±8.8         | 69.9±9.6         | <0.001   |
| Antihypertensive medication use, %     | 34.8             | 25.5             | 0.003    |
| Fatty liver (HU <sup>2</sup> <40), %   | 11.2             | 6.8              | 0.022    |
| CAC <sup>2</sup> Agatston score > 0, % | 58.7             | 23.7             | <0.001   |
| Common CIMT <sup>2</sup> (mm)          | 0.88 (0.77-1.01) | 0.82 (0.71-0.93) | <0.001   |
| Internal CIMT <sup>2</sup> (mm)        | 1.16 (0.99-1.41) | 1.07 (0.92-1.22) | <0.001   |

<sup>1</sup> Values are percentage, mean ± SD, or median (IQR).

<sup>2</sup> BS: bachelor's degree, HOMA-IR: homeostatic model assessment-insulin resistance, HU: Hounsfield unit, CAC: coronary artery calcium, CIMT: carotid intima-media thickness
